# Supplementary material for: Chinese Guidelines for the Diagnosis and Management of Tumefactive Demyelinating Lesions of Central Nervous System
Source: PubMed Central journal article supplement — Chin Med J (Engl). 2017 Aug 5;130(15):1838–50. doi: 10.4103/0366-6999.211547 (PMC5547837; doi:10.4103/0366-6999.211547), 2017-08-05

## SUPPLEMENTARY MATERIAL

2. **Flowchart for the diagnosis of tumefactive demyelinating lesions.** \*Based on the onset of disease including  $\leq 3$  weeks, 4–6 weeks,  $>7$  weeks, enhanced brain magnetic resonance imaging should be completed within the time, and the dynamic evolution of lesions can be monitored; †see comprehensive “diagnostic criteria” in this guideline.

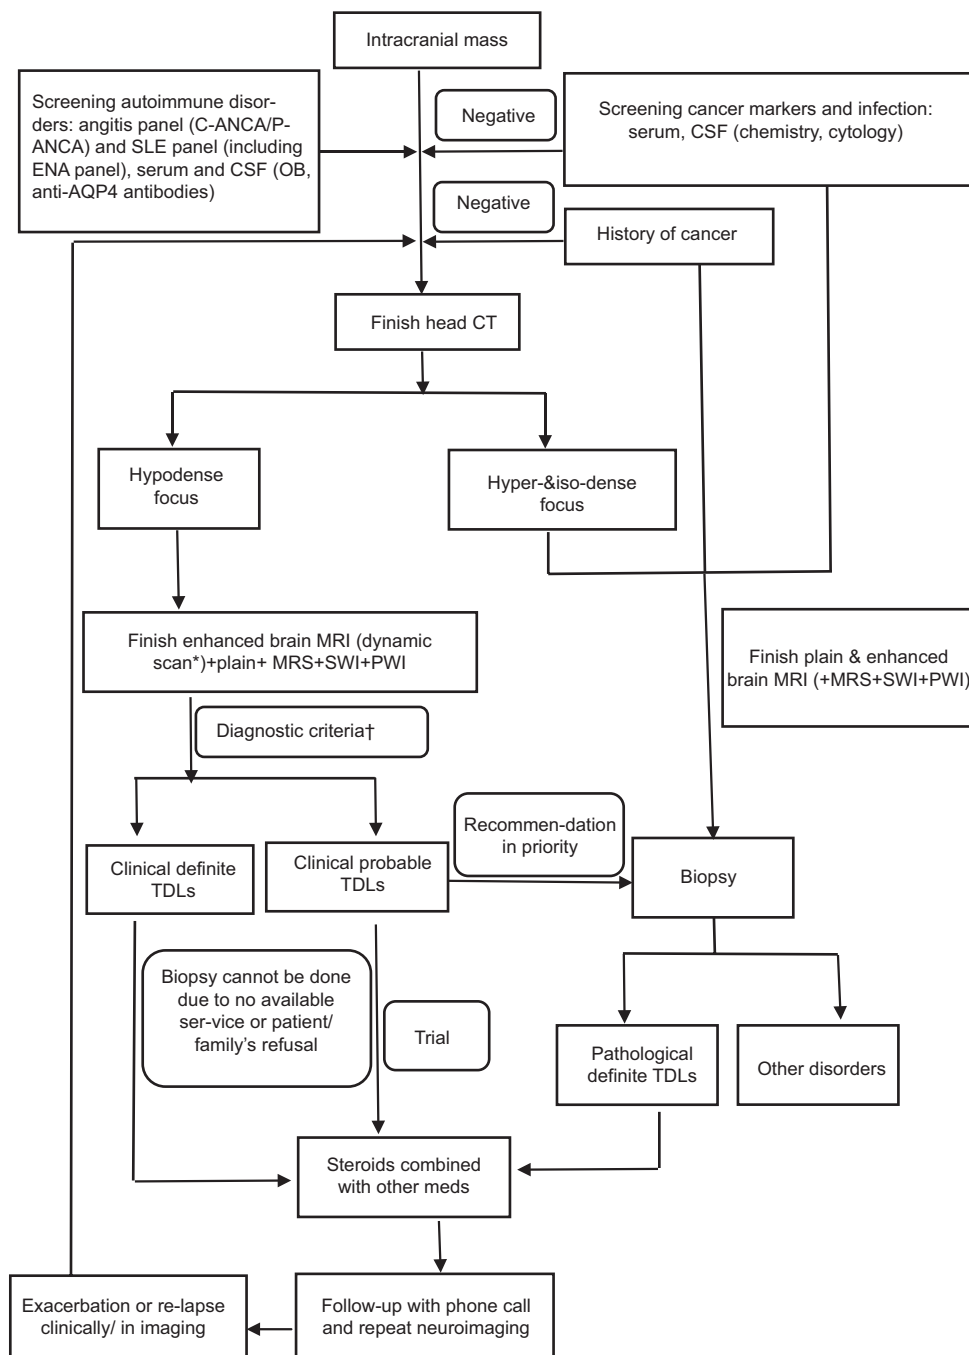

Supplement: CMJ-130-1838_Suppl2.pdf [file CMJ-130-1838_Suppl2.pdf]
